# Supplementary material for: Assessing electron transfer reactions and catalysis in multicopper oxidases with operando X-ray absorption spectroscopy
Source: PubMed Central journal article supplement (PMC6965173; doi:10.1038/s41467-019-14210-1), 2020-01-16
Supplement: 41467_2019_14210_MOESM1_ESM.pdf [file 41467_2019_14210_MOESM1_ESM.pdf]

## Supplementary Material

# **Assessing Electron Transfer Reactions and Catalysis in Multicopper Oxidases with *Operando* X-ray Absorption Spectroscopy**

*Lucyano J. A. Macedo, Ayaz Hassan, Graziela C. Sedenho, and Frank N. Crespilho\**

São Carlos Institute of Chemistry, Univeristy of São Paulo, São Carlos-SP 13560-970, Brazil  
\*frankcrespilho@iqsc.usp.br

Supplementary Figures

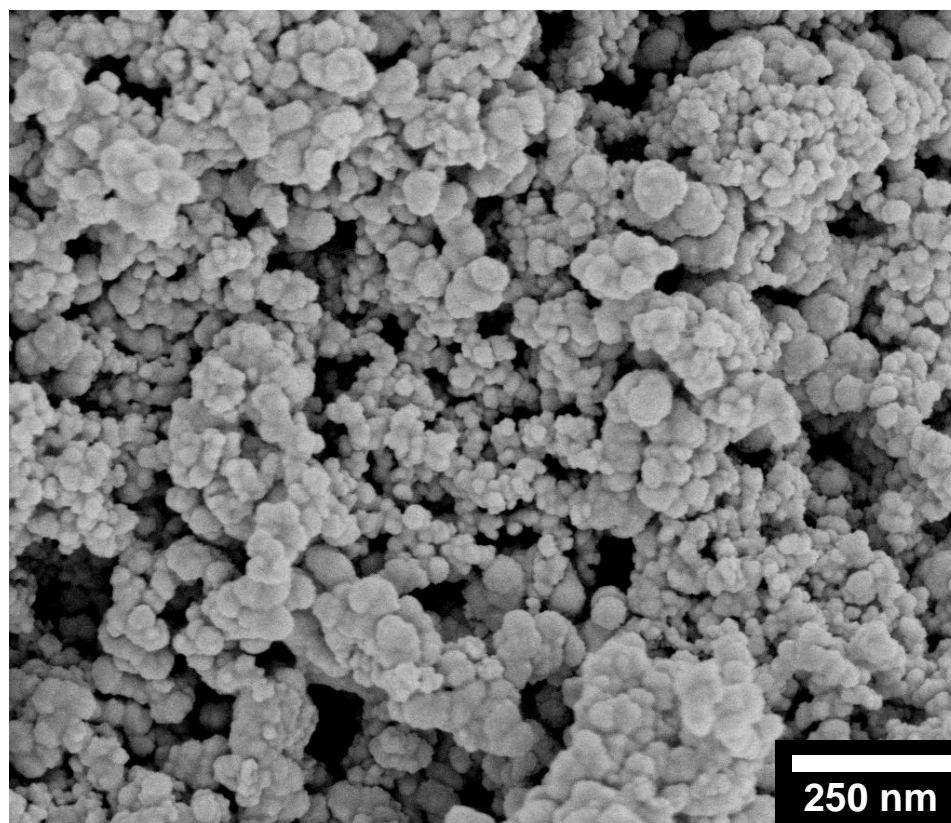

**Supplementary Figure 1.** Morphology of the electrode surface. SEM image of the carbon nanoparticles used on the working electrode.

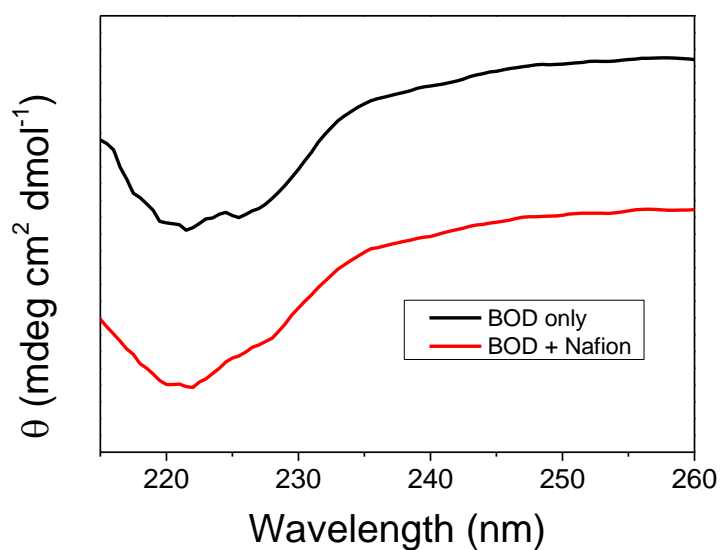

**Supplementary Figure 2.** Probing the secondary structure of the enzyme upon interaction with Nafion. Circular dichroism spectra of (●) BOD solution and (●) BOD + Nafion. Spectra were measured in a phosphate buffered electrolyte environment, pH 7.2.

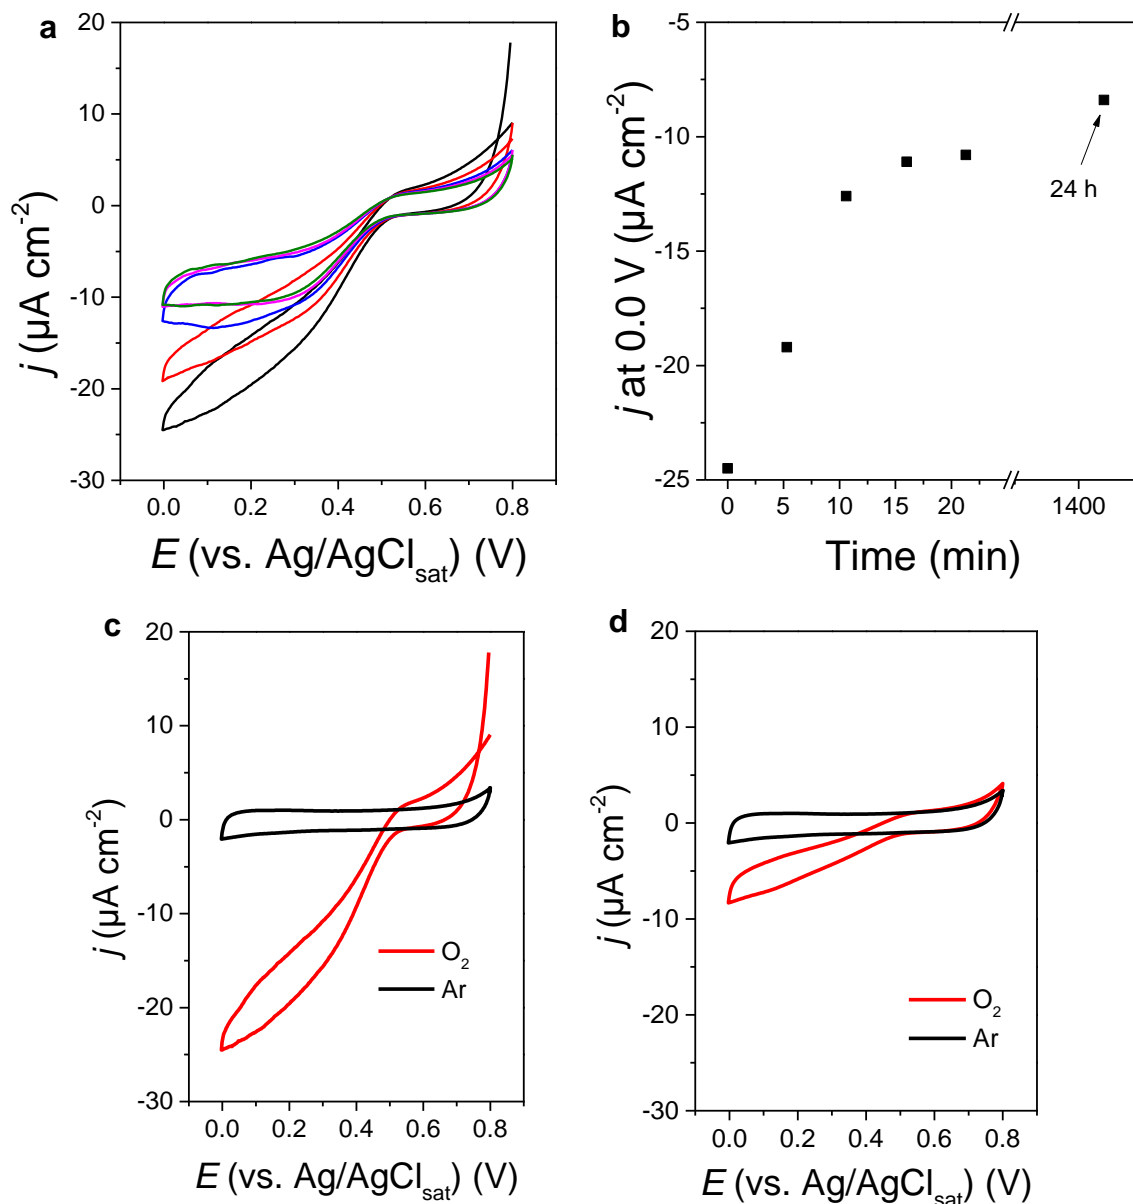

**Supplementary Figure 3.** Stability of the electrode for ORR. **a** Consecutive cyclic voltammograms of the *MvBOD*-modified CCo electrode. **b** Loss of catalytic current along time. **c** First cyclic voltammogram and **d** after 24 h draining current. Supporting electrolyte:  $0.1 \text{ mol L}^{-1}$  phosphate buffer (pH 7.2),  $T = 25 \text{ }^\circ\text{C}$ . Scan rate:  $5 \text{ mV s}^{-1}$ . The electrode surface seems to stabilize itself after 4 voltammetric cycles, indicating a loss of 52% after the first 4 cycles.

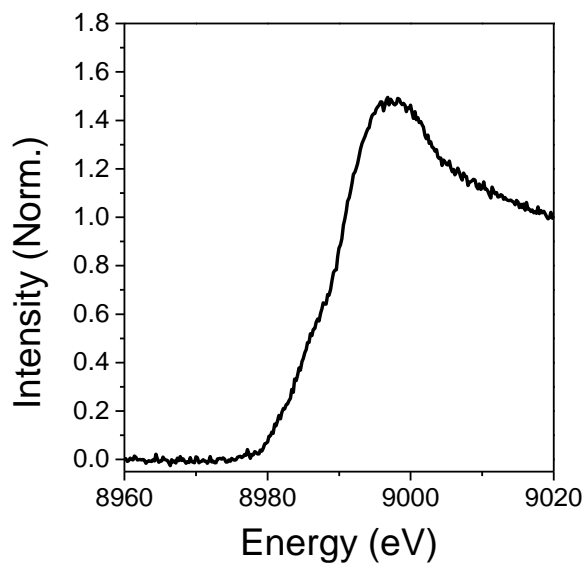

**Supplementary Figure 4.** Cu K-edge XAS spectrum of the *Mv*BOD-modified carbon electrode at OCP.

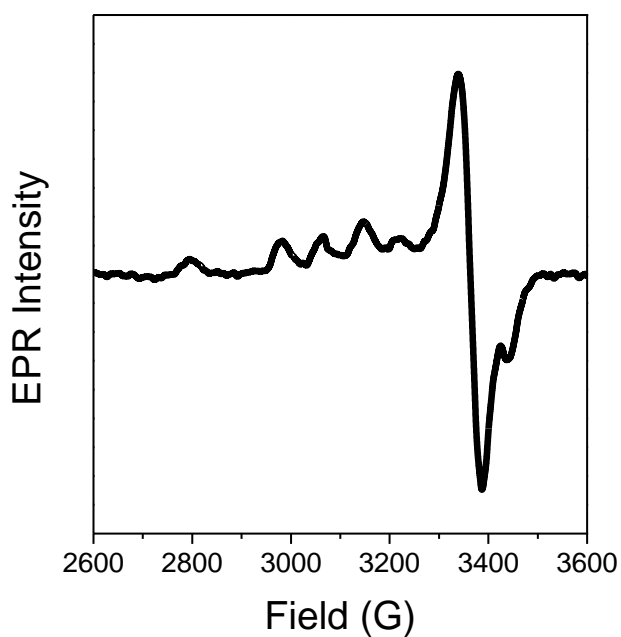

**Supplementary Figure 5.** X-band EPR spectrum of *Mv*BOD in phosphate buffer 0.1 mol L<sup>-1</sup> (pH 7.2). T = 77 K. Acquisition parameters were set as follows: Power = 3 mW, Modulation amplitude = 3 G, Modulation frequency = 100 kHz, Time constant = 327.68 ms, Conversion time = 81.92 ms.

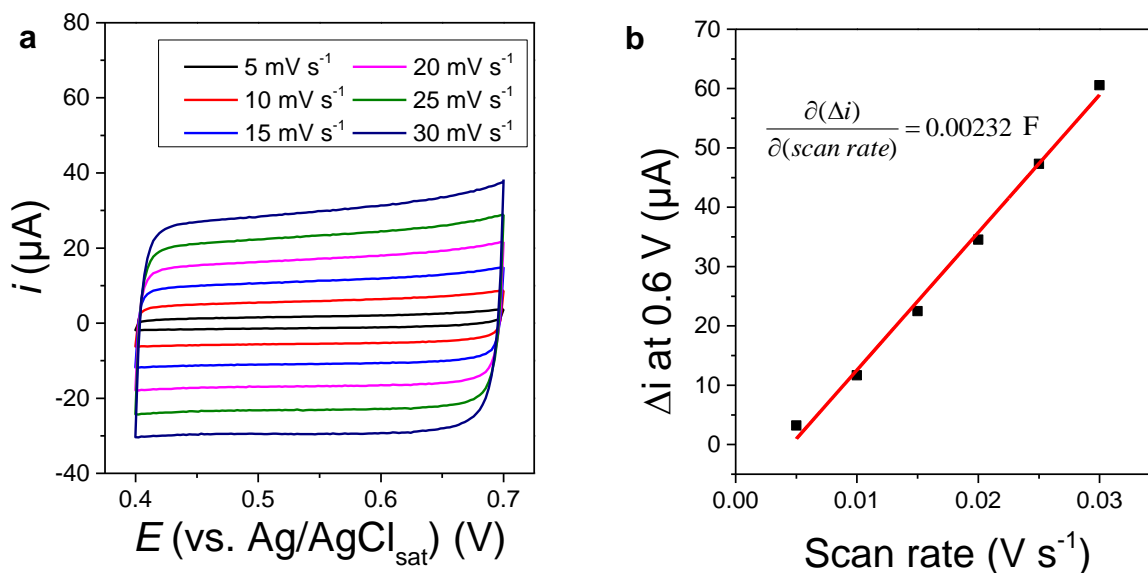

**Supplementary Figure 6.** Determining the electrochemical active surface area. **a** Cyclic voltammograms of the carbon electrode under different scan rates. **b** Difference of the capacitive currents at 0.6 V as function of the scan rate. Supporting electrolyte: phosphate buffer 0.1 mol L<sup>-1</sup> (pH 7.2), T = 25 °C.

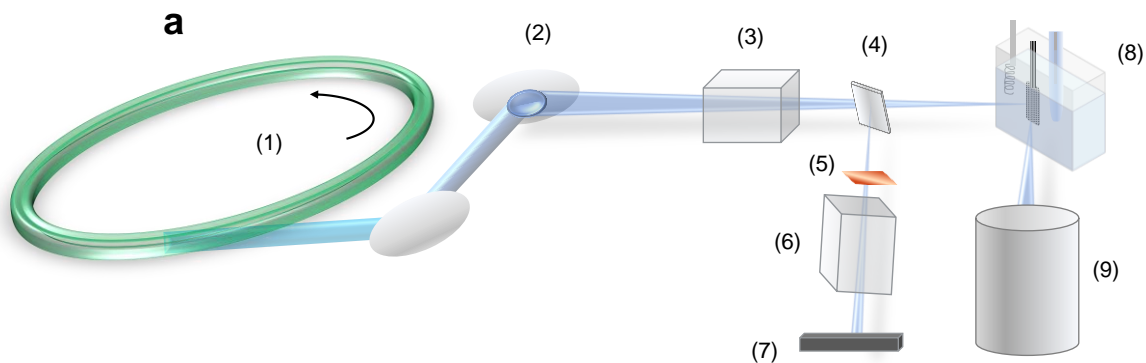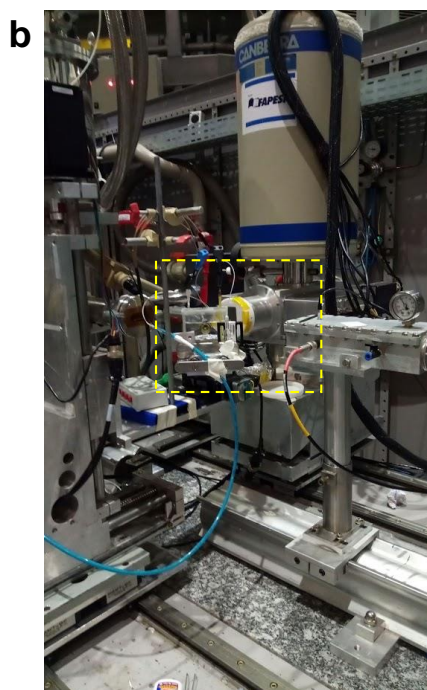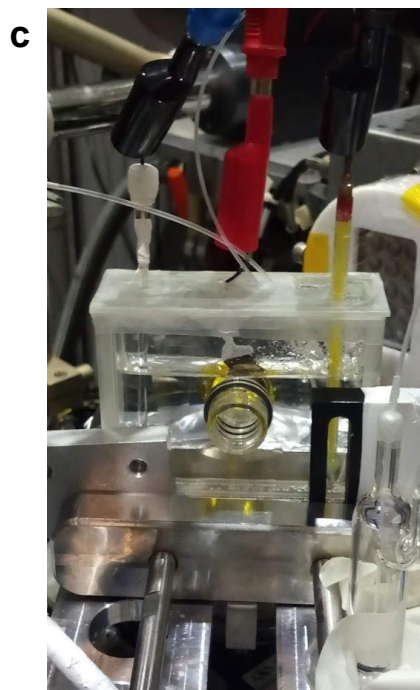

**Supplementary Figure 7.** XAS spectroelectrochemistry. **a** Experimental setup used in the *operando* XAS spectroelectrochemistry at the XAFS2 beamline of LNL (photon flux  $10^9$  photons/s): (1) Storage ring, (2) Monochromator, (3) First ionization chamber (4) Beamsplitter, (5) Copper foil used as reference, (6) Second ionization chamber, (7) Beam blocker, (8) Electrochemical cell/Sample-holder, (9) Detector. **b** *In situ* XAS experimental arrangement, highlighting the home-made electrochemical cell. **c** Zoomed photograph of the electrochemical cell.

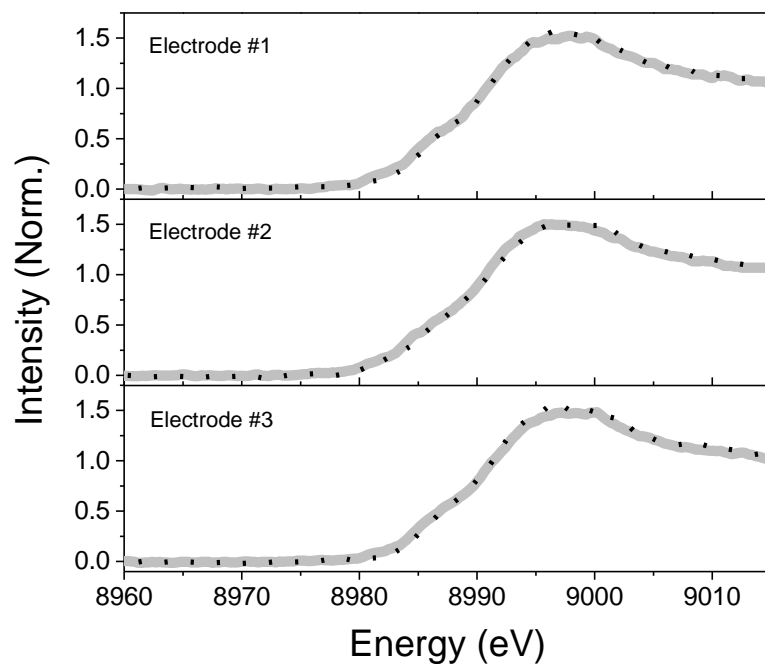

**Supplementary Figure 8.** Stability of the *MvBOD* structure upon irradiation with x-rays. Spectra collected at the (continuous gray line) first measurements and (black dotted line) after 6 hours of operation in the spectroelectrochemical measurements.
